# Supplementary material for: Thermally stable phthalonitrile resins based on multiple oligo (aryl ether)s with phenyl-s-triazine moieties in backbones
Source: Royal Society of Chemistry journal article supplement (doi:10.1039/c5ra12637a), 2015-01-01
Supplement: c5ra12637a1.pdf [file c5ra12637a1.pdf]

## Supplementary data

# Thermally stable phthalonitrile resins based on multiple oligo (aryl ether)s with phenyl-s-triazine moieties in backbones

Lishuai Zong, Cheng Liu, Yujie Guo, Jinyan Wang\*, and Xigao Jian

State Key Laboratory of Fine Chemicals, Department of Polymer Science and Materials, School of Chemical Engineering, Dalian University of Technology, Dalian 116024, China

\*Corresponding Author: E-mail: [wangjinyan@dlut.edu.cn](mailto:wangjinyan@dlut.edu.cn)

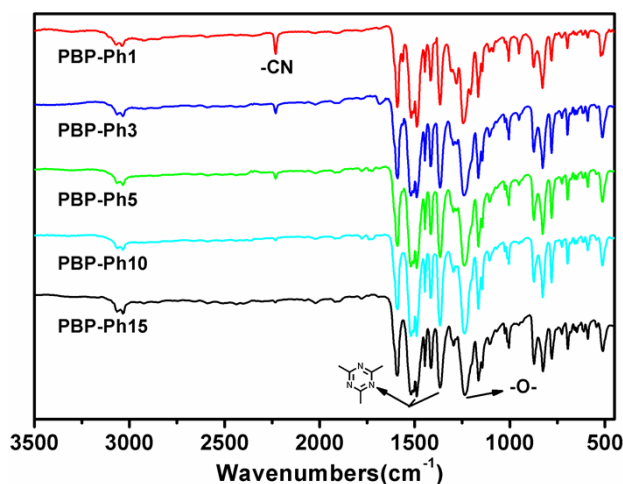

Fig. S1 FT-IR spectra of PBP-Phs.

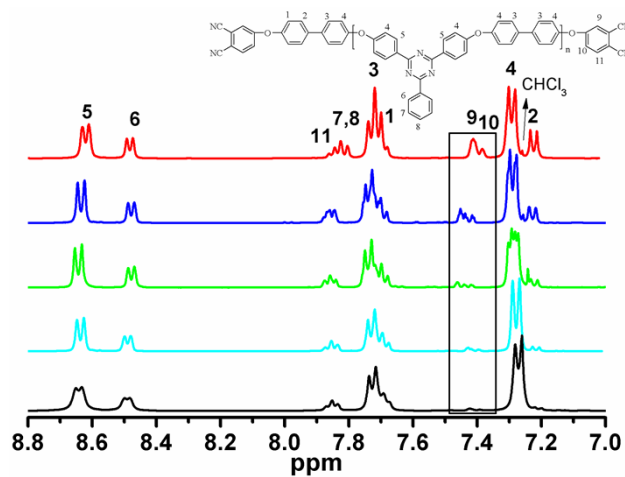

**Fig. S2**  $^1\text{H}$ -NMR spectra of PBP-Phs.

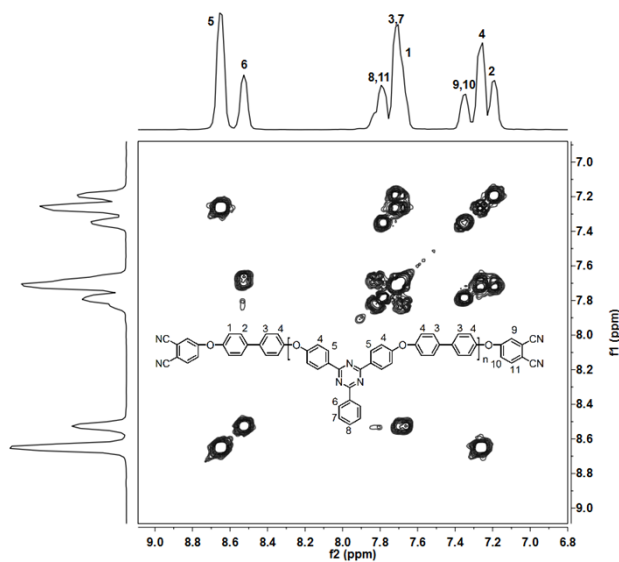

**Fig. S3**  $^1\text{H}$ - $^1\text{H}$  gCOSY spectrum ( $\text{CDCl}_3+\text{CF}_3\text{COOD}$ ) of PBP-Ph1, with assignments.

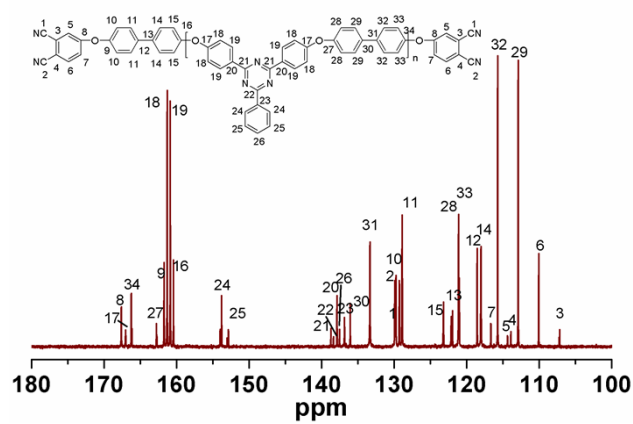

**Fig. S4**  $^{13}\text{C}$ -NMR spectrum ( $\text{CDCl}_3+\text{CF}_3\text{COOD}$ ) of PBP-Ph5, with assignments.

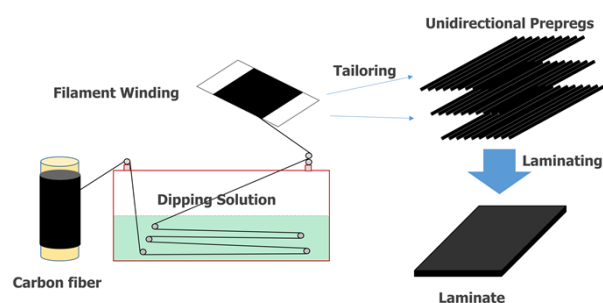

**Fig. S5** The schematic diagram for the fabrication of the CF/Th-PBP composite laminates.

### **Fabrication process of the 7/T300 composites**

All CF (T300) reinforced composites were fabricated *via* a similar procedure described as follows. 7.0 g oligomer was added to a three-necked flask and heated to melt at 250 °C (PBP-Ph1) or 280 °C (PBP-Ph3-10). 0.35 g BAPS was then added to the melted oligomer under vigorous stirring. The mixture was maintained at the melting temperature for 3-7 min, and then quenched to room temperature. The obtained B-stage resin was dissolved in 15 mL NMP. (The dipping solution of PBP-Ph15 was prepared by directly dissolving PBP-Ph15 and BAPS into NMP without undergoing B-stage resin formation.) The solution was equally poured onto sixteen plies of T300 CF weaves of 60×60×0.15 mm<sup>3</sup>. After dried at 60 °C on a horizontal heating board, all the prepregs were moved into a vacuum oven and maintained at 180 °C for 36 h and 200 °C for 1h. Then, the dried prepregs were compacted in a tight steel mold with a pressure of 2.5 MPa at 250 °C (PBP-Ph1) or 280 °C (PBP-Ph3-15) for 2 h. Then the steel mold was removed, and the laminate was cured at 250 °C for 1 h, 285 °C for 1 h, 325 °C for 3 h, 350 °C for 2 h, and 375 °C for 8 h in a muffle furnace. The thicknesses of all the finished laminates were approximately 2 mm. They should be sawed and sanded into 30×10×2 mm<sup>3</sup> size for DMA test. The cross-sectional images of the laminates are shown in Fig. S6.

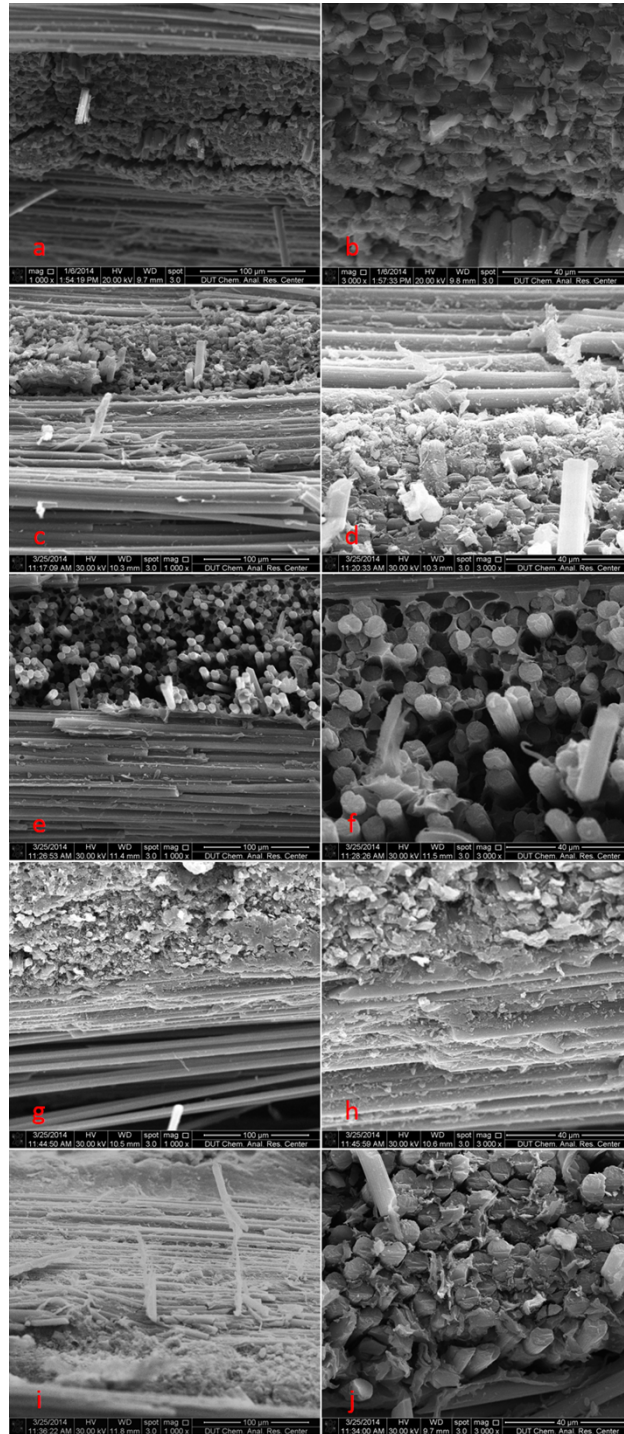

**Fig. S6.** The cross-sectional images for T300/Th-PBP laminates monitored by SEM instrument: (a, b) T300/Th-PBP1; (c, d) T300/Th-PBP3; (e, f) T300/Th-PBP5; (g, h) T300/Th-PBP10; (i, j) T300/Th-PBP15.

**Table S1** Rheologic parameters of PBP-Phs

| Sample   | $T_m(^{\circ}\text{C})^a$ | $ \eta^* _{\text{lowest}}(\text{Pa}\cdot\text{s})^b$ | $T_{\eta<100}(^{\circ}\text{C})^b$ | $t_{\text{gel}280}(\text{min})^c$ | $ \eta^* _{\text{ini}280}(\text{Pa}\cdot\text{s})^c$ |
|----------|---------------------------|------------------------------------------------------|------------------------------------|-----------------------------------|------------------------------------------------------|
| PBP-Ph1  | 211                       | 2.7                                                  | 218                                | 9.3                               | 7.0                                                  |
| PBP-Ph3  | 265                       | 12.4                                                 | 275                                | 7.3                               | 175.7                                                |
| PBP-Ph5  | 265                       | 34.7                                                 | 316                                | 5.9                               | 195.8                                                |
| PBP-Ph10 | 265                       | 37.6                                                 | 331                                | 3.9                               | 4414.0                                               |

a: detected by DSC; b: detected by rheometer without BAPS; c: detected by rheometer at 280°C with 5wt% BAPS.

**Table S2** Thermal data of Th-PBPs.

| Polymer  | $T_g(^{\circ}\text{C})^a$ | $T_{5\%}(^{\circ}\text{C})^b$ | $T_{10\%}(^{\circ}\text{C})$ | $T_{\text{max}}(^{\circ}\text{C})$ | $C_{y800}^{\circ\text{C}}(\%)$ | $C_{y900}^{\circ\text{C}}(\%)$ | Gel Content (%) <sup>c</sup> |
|----------|---------------------------|-------------------------------|------------------------------|------------------------------------|--------------------------------|--------------------------------|------------------------------|
| Th-PBP1  | 400                       | 538(543) <sup>d</sup>         | 570(577)                     | 589                                | 71(16)                         | 71(2)                          | 97                           |
| Th-PBP3  | 349                       | 559(574)                      | 582(596)                     | 596                                | 68(21)                         | 68(3)                          | 97                           |
| Th-PBP5  | 302                       | 562(575)                      | 579(594)                     | 594                                | 61(11)                         | 60(3)                          | 96                           |
| Th-PBP10 | 298                       | 571(575)                      | 587(593)                     | 593                                | 62(0)                          | 61(0)                          | 95                           |
| Th-PBP15 | 294                       | 582(575)                      | 592(589)                     | 601                                | 61(0)                          | 60(0)                          | 95                           |

<sup>a</sup> The values was recorded on DMA at the heating rate of 3 °C/min.

<sup>b</sup> The values was recorded on TGA at the heating rate of 20 °C/min in N<sub>2</sub> or air.

<sup>c</sup> The gel contents were measured according to the ASTM D2765-11 standard.

<sup>d</sup> The values in the brackets were recorded on TGA under air atmosphere.

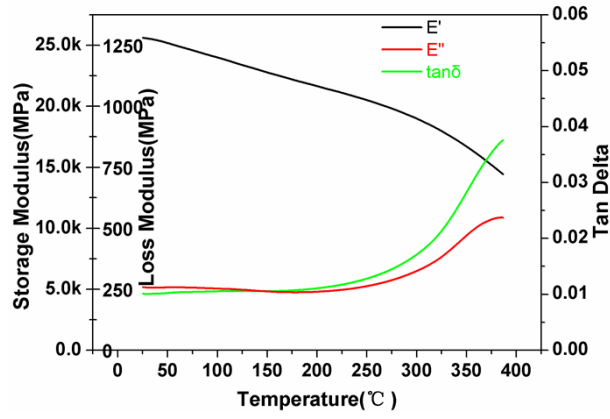

Fig. S7 DMA curves of T700/Th-PBP1 laminate.

**Table S3** Thermal property and processability comparison of PN resins.

| PN precursors | Chemical structure | $T_g$<br>(°C) | $T_{d5\%,N_2}$<br>(°C) | $T_{d5\%,air}$<br>(°C) | Refs. |
|---------------|--------------------|---------------|------------------------|------------------------|-------|
| PN oligomer   |                    |               |                        |                        |       |
| 5             |                    | ca.400        | 538                    | 543                    | -     |
| 5             |                    | ca.400        | 555                    | 552                    | -     |
| xo-HEI(1)     | Ar:                | -             | 540                    | -                      | 1     |
| xo-REI(5)     |                    | -             | 521                    | -                      | 1     |
| xo-BEI(1)     |                    | -             | 550                    | -                      | 1     |
| 6             | R:                 | 370           | ca.500 <sup>f</sup>    | ca.525                 | 2     |
| 6A            |                    | >310          | ca.500 <sup>f</sup>    | -                      | 3     |
| 6A'           |                    | >310          | ca.500 <sup>f</sup>    | -                      | 3     |
| N=2           |                    | 240           | 506                    | 501                    | 4     |
| 1             |                    | ca. 450       | 495                    | 505                    | 5     |
| 1a            |                    | >400          | 490                    | 490                    | 6     |
| 1b            |                    | >400          | 490                    | 495                    | 6     |

|            |  |      |         |       |    |
|------------|--|------|---------|-------|----|
| PEN-t-Ph   |  | 188  | 525     | -     | 7  |
| 2CN-o-PEEK |  | 208  | 517     | -     | 8  |
| 2PEN-BPh   |  | >450 | 560     | 518   | 9  |
| 2PEN-BAPh  |  | -    | 512     | 512   | 10 |
| PAEK-CN    |  | >400 | 515     | 516   | 11 |
| 5          |  | >300 | ca.540' | ca500 | 12 |

Polymer with pendent PN units

|         |     |     |     |   |    |
|---------|-----|-----|-----|---|----|
| PEN-CN3 |     | 213 | 475 | - | 13 |
|         |     |     |     |   | 14 |
| PI-4a   | Ar: | 220 | 509 | - | 14 |
| PI-4b   |     | 234 | 529 | - | 14 |
| PI-4c   |     | 209 | 520 | - | 14 |



|          |                                                                                     |                |                     |                     |    |
|----------|-------------------------------------------------------------------------------------|----------------|---------------------|---------------------|----|
| CN-PA    | 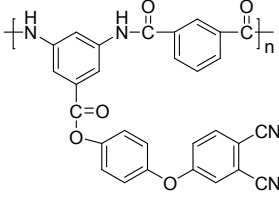   | 325            | 380                 | -                   | 15 |
|          | PN monomer                                                                          |                |                     |                     |    |
| HHPZ-PH  |    | - <sup>a</sup> | 514                 | 528                 | 16 |
| BPh      |    | >450           | 511                 | 517                 | 17 |
| BAPh     |    | >450           | ca.515 <sup>f</sup> | ca.545 <sup>f</sup> | 17 |
| 6FPH     |   | >450           | 485                 | 485                 | 17 |
| RPh      |  | >400           | ca.505 <sup>f</sup> | ca.510 <sup>f</sup> | 18 |
| BDS      |  | 337            | 436                 | 441                 | 19 |
| 1,6-BDCN |  | >465           | 553                 | 549                 | 20 |
| BZBPH    |  | -              | 478                 | 482                 | 21 |
| I        |  | 316            | 450                 | 420                 | 22 |
| III      |  | -              | 544                 | 390                 | 22 |

|                          |                                                                                     |      |     |     |    |
|--------------------------|-------------------------------------------------------------------------------------|------|-----|-----|----|
| IV                       | 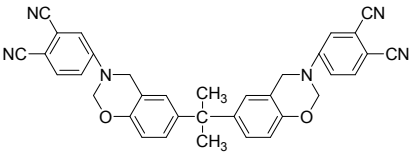   | 330  | 423 | -   | 22 |
| 1                        |    | 350  | 444 | 437 | 23 |
| 2                        |    | >450 | 490 | 488 | 23 |
| 3                        |    | >500 | 512 | 500 | 23 |
| TDPE                     |  | >380 | 556 | 543 | 24 |
| Self-promoted PN monomer |                                                                                     |      |     |     |    |
| 2O                       |  | 582  | 527 | 505 | 25 |
| 2M                       |  | 565  | 524 | 512 | 25 |
| 2P                       |  | 580  | 528 | 518 | 25 |
| 3a                       |  | >500 | 517 | 496 | 26 |

|                |  |      |     |     |    |
|----------------|--|------|-----|-----|----|
| 3b             |  | >500 | 506 | 501 | 26 |
| 3c             |  | >500 | 531 | 502 | 26 |
| 4O             |  | 450  | 529 | 520 | 27 |
| 4M             |  | 420  | 525 | 514 | 27 |
| 4P             |  | 450  | 528 | 514 | 27 |
| HSiPN          |  | >450 | 535 | 558 | 28 |
| MeSiPN         |  | 424  | 541 | 543 | 28 |
| ViSiPN         |  | 428  | 570 | 562 | 28 |
| DBPA-Ph        |  | >350 | 478 | 464 | 29 |
| BIPN           |  | >325 | 540 | 535 | 30 |
| PIPn           |  | -    | 516 | 518 | 31 |
| 3PN3PEOD<br>PA |  | >400 | 516 | -   | 32 |

<sup>a</sup> The specific data was not mentioned or different to read from the relevant figures.

<sup>f</sup>The values were roughly read from the relevant figures in order to make comparisons.

## References

1. C. Liu, J. Y. Wang, E. C. Lin, L. S. Zong and X. G. Jian, *Polym. Degrad. Stab.* , 2012, **97**, 460-468.
2. M. Laskoski, D. D. Dominguez and T. M. Keller, *J. Polym. Sci., Part A: Polym. Chem.* , 2005, **43**, 4136-4143.
3. T. M. Keller, *Chem. Mater.* , 1994, **6**, 302-305.
4. D. D. Dominguez and T. M. Keller, *High Perform. Polym.* , 2006, **18**, 283-304.
5. M. Laskoski, D. D. Dominguez and T. M. Keller, *J. Polym. Sci., Part A: Polym. Chem.* , 2013, **51**, 4774-4778.
6. M. Laskoski, D. D. Dominguez and T. M. Keller, *Polymer*, 2007, **48**, 6234-6240.
7. Y. Zou, J. Yang, Y. Zhan, X. Yang, J. Zhong, R. Zhao and X. Liu, *J. Appl. Polym. Sci.* , 2012, **125**, 3829-3835.
8. H. Zhang, T. Liu, W. Yan, Y. Su, H. Yu, Y. Yang and Z. Jiang, *High Perform. Polym.* , 2014, **26**, 1007-1014.
9. X. Yang, J. Zhang, Y. Lei, J. Zhong and X. Liu, *J. Appl. Polym. Sci.* , 2011, **121**, 2331-2337.
10. R. Du, W. Li and X. Liu, *Polym. Degrad. Stab.* , 2009, **94**, 2178-2183.
11. T. Liu, Y. Yang, T. Wang, H. Wang, H. Zhang, Y. Su and Z. Jiang, *Polym. Eng. Sci.* , 2014, **54**, 1695-1703.
12. T. M. Keller, *Polymer*, 1993, **34**, 952-955.
13. J. Yang, X. L. Yang, Y. K. Zou, Y. Q. Zhan, R. Zhao and X. B. Liu, *J. Appl. Polym. Sci.* , 2012, **126**, 1129-1135.
14. K. Zeng, Y. Zou and G. Yang, *Des. Monomers Polym.* , 2014, **17**, 186-193.
15. K. Zeng, H. B. Hong, S. H. Zhou, D. M. Wu, P. K. Miao, Z. F. Huang and G. Yang, *Polymer*, 2009, **50**, 5002-5006.
16. G. P. Yu, C. Liu, X. P. Li, J. Y. Wang, X. G. Jian and C. Y. Pan, *Polym. Chem.* , 2012, **3**, 1024-1032.
17. S. B. Sastri and T. M. Keller, *J. Polym. Sci., Part A: Polym. Chem.* , 1999, **37**, 2105-2111.
18. T. M. Keller and D. D. Dominguez, *Polymer*, 2005, **46**, 4614-4618.
19. X. Peng, H. Sheng, H. Guo, K. Naito, X. Yu, H. Ding, X. Qu and Q. Zhang, *High Perform. Polym.* , 2014, **26**, 837-845.
20. F. Zhao, R. Liu, C. Kang, X. Yu, K. Naito, X. Qu and Q. Zhang, *RSC Adv.* , 2014, **4**, 8383-8390.
21. F. Zuo and X. Liu, *J. Appl. Polym. Sci.* , 2010, **117**, 1469-1475.
22. Z. Brunovska, R. Lyon and H. Ishida, *Thermochim. Acta* 2000, **357-358**, 195-203.
23. A. Badshah, M. R. Kessler, H. Zhou and A. Hasan, *Polym. Int.* , 2014, **63**, 465-469.
24. H. Sheng, X. Peng, H. Guo, X. Yu, C. Tang, X. Qu and Q. Zhang, *Mater. Chem. Phys.* , 2013, **142**, 740-747.
25. H. Zhou, A. Badshah, Z. Luo, F. Liu and T. Zhao, *Polym. Adv. Technol.* , 2011, **22**, 1459-1465.
26. A. Badshah, M. R. Kessler, H. Zhou, J. H. Zaidi, S. Hameed and A. Hasan, *Polym. Chem.* , 2013, **4**, 3617-3622.
27. B. Amir, H. Zhou, F. Liu and H. Aurangzeb, *J. Polym. Sci., Part A: Polym. Chem.* , 2010, **48**, 5916-5920.
28. Z. B. Zhang, Z. Li, H. Zhou, X. K. Lin, T. Zhao, M. Y. Zhang and C. H. Xu, *J. Appl. Polym. Sci.* , 2014, **131**.

29. X. Q. Zou, M. Z. Xu, K. Jia and X. B. Liu, *J. Appl. Polym. Sci.* , 2014, **131**, 41203-41209.
30. D. M. Wu, Y. C. Zhao, K. Zeng and G. Yang, *J. Polym. Sci., Part A: Polym. Chem.* , 2012, **50**, 4977-4982.
31. J. Hu, Y. Liu, Y. Jiao, S. Ji, R. Sun, P. Yuan, K. Zeng, X. Pu and G. Yang, *RSC Adv.* , 2015, **5**, 16199-16206.
32. P. Yuan, Y. Liu, K. Zeng and G. Yang, *Des. Monomers Polym.* , 2015, **18**, 343-349.
